# Supplementary material
Source: PubMed Central journal article supplement (PMC3208191)

## Supplementary Materials

### Association of polymorphisms in the *Hepatocyte Growth Factor (HGF)* gene promoter with keratoconus.

Kathryn P. Burdon<sup>1</sup>, Stuart Macgregor<sup>2</sup>, Yelena Bykhovskaya<sup>3</sup>, Sharhbanou Javadiyan<sup>1</sup>, Xiaohui Li<sup>3,4</sup>, Kate J. Laurie<sup>1</sup>, Dorota Muszynska<sup>5</sup>, Richard Lindsay<sup>6</sup>, Judith Lechner<sup>5</sup>, Talin Haritunians<sup>4</sup>, Anjali K. Henders<sup>2</sup>, Durga Dash<sup>5</sup>, David Siscovick<sup>7</sup>, Seema Anand<sup>1</sup>, Anthony Aldave<sup>8</sup>, Douglas J. Coster<sup>1</sup>, Loretta Szczotka-Flynn<sup>9</sup>, Richard A. Mills<sup>1</sup>, Sudha K. Iyengar<sup>9</sup>, Kent D. Taylor<sup>4</sup>, Tony Phillips<sup>1</sup>, Grant W Montgomery<sup>2</sup>, Jerome I. Rotter<sup>4</sup>, Alex W. Hewitt<sup>10</sup>, Shiwani Sharma<sup>1</sup>, Yaron S. Rabinowitz<sup>3</sup>, Colin Willoughby<sup>5</sup>, Jamie E. Craig<sup>1</sup>

**Supplementary Table 1:** SNPs genotyped in individual DNA samples, identified through genome-wide association scan of pooled DNA. P-values in the pooled GWAS and in individual typing of the same samples (validation) are shown, as well as in the primary replication cohort for validated SNPs. Validated SNPs (defined as  $p < 9.0 \times 10^{-3}$  in the individual typing) are indicated in **bold**. Replicated SNPs (defined as  $p < 0.05$  in replication cohort as well as being validated) are in ***bold italics***.

| Nearest Gene | SNP        | Chr | Position (bp) | P-value in pooled GWAS | P-value in validation        | P-value in replication |
|--------------|------------|-----|---------------|------------------------|------------------------------|------------------------|
| C1orf94      | rs771392   | 1   | 34521402      | 1.64E-08               | 0.1023                       |                        |
| ADORA3       | rs1361133  | 1   | 111828556     | 4.39E-06               | 0.0229                       |                        |
| FLJ36116     | rs4838968  | 1   | 113161960     | 1.38E-11               | <b>0.0005</b>                | 0.4426                 |
| OSR1         | rs1727177  | 2   | 19356060      | 5.94E-08               | <b>0.0004</b>                | 0.6836                 |
| LRP1B        | rs10496894 | 2   | 142222836     | 3.41E-05               | 0.0749                       |                        |
| ADAM23       | rs13420297 | 2   | 207165510     | 7.63E-03               | 0.0370                       |                        |
| ADAM23       | rs10490745 | 2   | 207174805     | 9.51E-05               | 0.0138                       |                        |
| ADAM23       | rs13396148 | 2   | 207192617     | 3.08E-06               | 0.0370                       |                        |
| ATP8A1       | rs3749530  | 4   | 42287997      | 7.30E-08               | <b>0.0004</b>                | 0.6746                 |
| ATP8A1       | rs7681922  | 4   | 42300164      | 9.34E-05               | <b>0.0002</b>                | 0.8880                 |
| CHSY3        | rs12188544 | 5   | 129768423     | 4.93E-05               | 0.0274                       |                        |
| CHSY3        | rs6893341  | 5   | 129846454     | 5.65E-04               | 0.0274                       |                        |
| CHSY3        | rs10520081 | 5   | 129862210     | 3.25E-05               | 0.0292                       |                        |
| KRT18P50     | rs567149   | 6   | 96542399      | 3.28E-07               | 0.0128                       |                        |
| MTHFD1L      | rs1771798  | 6   | 151323260     | 5.83E-07               | <b>0.0007</b>                | 0.4095                 |
| ARID1B       | rs17087267 | 6   | 156627585     | 1.19E-08               | <b>0.0019</b>                | 0.2617                 |
| ARID1B       | rs9480347  | 6   | 156910347     | 8.13E-05               | 0.0167                       |                        |
| ARID1B       | rs6927999  | 6   | 156913513     | 8.67E-03               | 0.0135                       |                        |
| HGF          | rs7799610  | 7   | 81128458      | 2.31E-06               | 0.0518                       |                        |
| HGF          | rs1014091  | 7   | 81246485      | 4.99E-05               | <b>0.0084</b>                | <b>0.0083</b>          |
| NUB1         | rs6963048  | 7   | 150700229     | 6.55E-06               | <b>4.22E-05</b>              | 0.1605                 |
| ZFX4         | rs4548159  | 8   | 77496519      | 9.22E-06               | <b>0.0050</b>                | 0.0763                 |
| SDC2         | rs1020344  | 8   | 97526709      | 6.41E-05               | <b>0.0079</b>                | 0.2569                 |
| PTPRD        | rs1331660  | 9   | 9029222       | 7.17E-08               | 0.0102                       |                        |
| COL27A1      | rs10817573 | 9   | 115947269     | 2.91E-06               | <b>0.0001</b>                | 0.8186                 |
| CDH23        | rs10999876 | 10  | 72982127      | 7.93E-03               | 0.0185                       |                        |
| CTSC         | rs520864   | 11  | 87623983      | 7.75E-03               | 0.1778                       |                        |
| SOX5         | rs10842183 | 12  | 23624709      | 6.05E-08               | 0.0863                       |                        |
| CS           | rs744051   | 12  | 54953565      | 3.24E-06               | <b>0.0066</b>                | 0.2683                 |
| PAN2         | rs2291361  | 12  | 55004072      | 1.07E-05               | <b>0.0066</b>                | 0.2683                 |
| PAN2         | rs2643626  | 12  | 55012785      | 9.91E-03               | 0.0196                       |                        |
| IL23A        | rs11171806 | 12  | 55019798      | 7.18E-03               | 0.0059                       |                        |
| TMEM132C     | rs7959567  | 12  | 127755803     | 8.96E-10               | 0.0188                       |                        |
| LOC432369    | rs9512928  | 13  | 27411301      | 1.90E-08               | 0.0200                       |                        |
| ABCC4        | rs17189540 | 13  | 94706508      | 1.58E-03               | 0.0336                       |                        |
| ABCC4        | rs17268275 | 13  | 94710845      | 6.60E-05               | 0.0336                       |                        |
| ACTN1        | rs1950712  | 14  | 68550317      | 9.68E-03               | 0.0259                       |                        |
| FBN1         | rs16961065 | 15  | 46593831      | 6.71E-03               | 0.0550                       |                        |
| FBN1         | rs2118181  | 15  | 46703176      | 3.46E-03               | 0.0820                       |                        |
| CHSY1        | rs12148369 | 15  | 99584813      | 1.06E-03               | 0.0096                       |                        |
| CDH11        | rs16967999 | 16  | 63486525      | 1.04E-05               | <b>2.30x10<sup>-5</sup></b>  | 0.5215                 |
| CDH11        | rs185394   | 16  | 63527844      | 2.10E-04               | <b>1.83x10<sup>-5</sup></b>  | 0.6040                 |
| CDH11        | rs257341   | 16  | 63554514      | 8.75E-03               | <b>4.18 x10<sup>-5</sup></b> | 0.7943                 |

|         |            |    |          |          |                              |        |
|---------|------------|----|----------|----------|------------------------------|--------|
| CDH11   | rs35195    | 16 | 63583219 | 6.44E-04 | <b>2.00 x10<sup>-5</sup></b> | 0.7170 |
| CDH11   | rs257490   | 16 | 63609142 | 3.45E-03 | <b>3.33 x10<sup>-5</sup></b> | 0.7170 |
| CDH1    | rs3785076  | 16 | 67408284 | 3.87E-06 | 0.0172                       |        |
| KC6     | rs2848758  | 18 | 37355417 | 5.59E-03 | 0.1026                       |        |
| NETO1   | rs9963971  | 18 | 69047309 | 4.99E-06 | 0.0164                       |        |
| MACROD2 | rs200744   | 20 | 15542367 | 7.41E-07 | <b>0.0001</b>                | 0.7974 |
| ZHX3    | rs6016541  | 20 | 39369419 | 3.14E-06 | 0.0315                       |        |
| NCAM2   | rs2826767  | 21 | 21582667 | 1.90E-05 | 0.0158                       |        |
| TIMP3   | rs11703156 | 22 | 31559804 | 9.48E-04 | 0.0355                       |        |

**Supplementary Figure 1:** Flowchart depicting genotyping strategies and cohorts utilised in the two independent genetic studies.

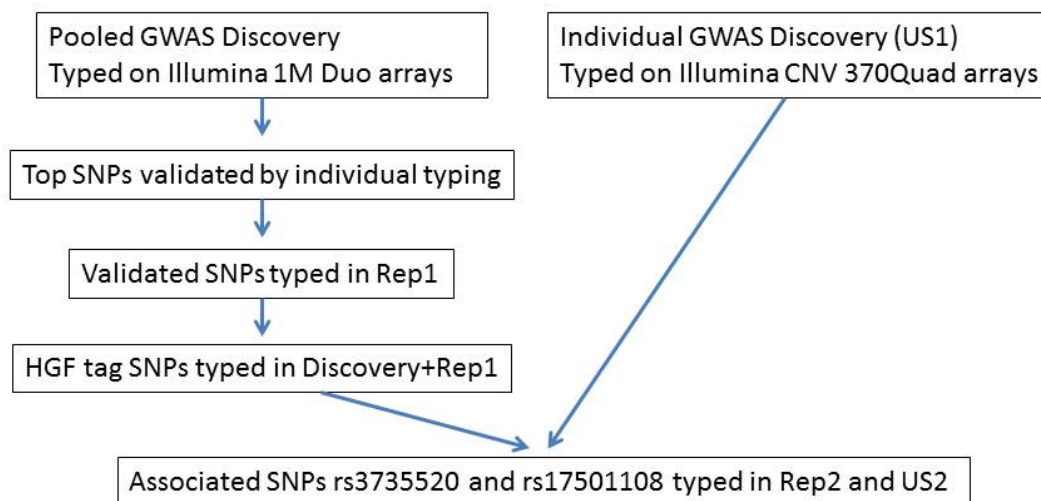

Supplement: 11-8261_z7g999112187s1.pdf [file 11-8261_z7g999112187s1.pdf]
